# Fgf8a induces neural crest indirectly through the activation of Wnt8 in the paraxial mesoderm

Chang-Soo Hong<sup>1,2</sup>, Byung-Yong Park<sup>2</sup> and Jean-Pierre Saint-Jeannet<sup>2,\*</sup>

Two independent signals are necessary for neural crest (NC) induction in *Xenopus*: a Bmp signal, which must be partially attenuated by Bmp antagonists, and a separate signal mediated by either a canonical Wnt or an Fgf. The mesoderm underlying the NC-forming region has been proposed as a source of this second signal. Wnt8 and Fgf8a are expressed in this tissue around the time of NC induction and are therefore good candidate NC inducers. Loss-of-function studies indicate that both of these ligands are necessary to specify the NC; however, it is unclear whether these signaling molecules are operating in the same or in parallel pathways to generate the NC. Here, we describe experiments addressing this outstanding question. We show that although Wnt8 expression can restore NC progenitors in Fgf8a-deficient embryos, Fgf8a is unable to rescue NC formation in Wnt8-depleted embryos. Moreover, the NC-inducing activity of Fgf8a in neuralized explants is strongly repressed by co-injection of a Wnt8 or a  $\beta$ -catenin morpholino, suggesting that the activity of these two signaling molecules is linked. Consistent with these observations, Fgf8a is a potent inducer of Wnt8 in both whole embryos and animal explants, and Fgf8a knockdown results in a dramatic loss of Wnt8 expression in the mesoderm. We propose that Fgf8a induces NC indirectly through the activation of Wnt8 in the paraxial mesoderm, which in turn promotes NC formation in the overlying ectoderm primed by Bmp antagonists.

**KEY WORDS:** Fgf8, Wnt8, Bmp, Neural crest, Induction, *Xenopus*

## INTRODUCTION

The neural crest (NC) is a population of cells unique to the vertebrate embryo. NC progenitors originate from the neural plate border, and as the neural tube closes undergo an epithelial-to-mesenchymal transition that allows them to migrate into the periphery and to contribute to multiple lineages, including the developing heart, the peripheral nervous system and much of the craniofacial skeleton (LeDouarin et al., 2004). At the time of its induction, the NC-forming region is flanked by the neural plate on one side and the non-neural ectoderm on the other, and sits on top of the underlying paraxial mesoderm. Because of their position relative to the NC, each one of these tissues has been proposed as a source of NC inducer(s). The relative contribution of these tissues to NC induction appears to vary greatly from one species to another (reviewed by Knecht and Bronner-Fraser, 2002; Huang and Saint-Jeannet, 2004).

At least three major signaling pathways have been implicated in NC induction (reviewed by Jones and Trainor, 2005). Studies in frog and fish have shown that NC forms in regions of the ectoderm where Bone Morphogenetic Protein (Bmp) signaling is partially attenuated by Bmp antagonists, such as Chordin, Noggin and Follistatin, which are derived from the axial mesoderm (Marchant et al., 1998; Nguyen et al., 1998; Tribulo et al., 2003). However, it is also true that changes in Bmp signaling levels in the ectoderm are not sufficient for NC induction and that other signaling pathways are involved (LaBonne and Bronner-Fraser, 1998; Garcia-Castro et al., 2002). A large body of work indicates that signaling through the canonical Wnt pathway is crucial to specify the NC in fish, frog and chick

(Saint-Jeannet et al., 1997; LaBonne and Bronner-Fraser, 1998; Chang and Hemmati-Brivanlou, 1998; Bang et al., 1999; Dearnorff et al., 2001; Garcia-Castro et al., 2002; Lewis et al., 2004) (reviewed by Wu et al., 2003; Heeg-Truesdell and LaBonne, 2007). The source of this Wnt signal has been proposed to reside in the paraxial mesoderm of frog and fish (Bang et al., 1999; Lewis et al., 2004), and in the ectoderm of birds (Garcia-Castro et al., 2002). In the mouse, the situation is not as clearly defined. Genetic analyses suggest that Wnt signaling may have a role in NC lineage specification, rather than in induction (Ikeya et al., 1997; Hari et al., 2002). However, because of functional redundancy, an earlier role of Wnt in NC formation cannot be completely excluded.

Studies in *Xenopus* have shown that members of the Fibroblast Growth Factor (Fgf) family are also involved in NC induction (Kengaku and Okamoto, 1993; Mayor et al., 1995; Mayor et al., 1997; Villanueva et al., 2002; Monsoro-Burq et al., 2003). Expression of a dominant-negative Fgf receptor blocks NC formation in the whole embryo (Mayor et al., 1997) and in animal explants recombined with paraxial mesoderm (Monsoro-Burq et al., 2003). Fgf8 is expressed in the paraxial mesoderm and is a likely candidate to mediate this activity (Monsoro-Burq et al., 2003). So far, *Xenopus* is the only model organism in which Fgf signaling has been implicated in NC induction.

Therefore, in *Xenopus*, NC induction depends on a Bmp signal, which must be partially attenuated by Bmp antagonists, and on a separate signal mediated by either a canonical Wnt or an Fgf. However, it is unclear how Wnt and Fgf interact at the neural plate border to generate the NC. While there are suggestions that these pathways might be linked (LaBonne and Bronner-Fraser, 1998), there is also evidence that they may act independently (Monsoro-Burq et al., 2003; Monsoro-Burq et al., 2005). In this study, we present a comparative analysis of the NC-inducing activity of Wnt8 and Fgf8a, two candidate NC inducers in *Xenopus*. Loss- and gain-of-function studies indicate that these ligands share very similar properties. Individually, Fgf8a and Wnt8 are both necessary to specify the NC. By using a number of assays in the whole embryo

<sup>1</sup>Department of Biological Science, College of Natural Sciences, Daegu University, Jillyang, Gyeongsan, Gyeongbuk 712-714, South Korea. <sup>2</sup>Department of Animal Biology, School of Veterinary Medicine, University of Pennsylvania, 3800 Spruce Street, Philadelphia, PA 19104, USA.

\* Author for correspondence (e-mail: saintj@vet.upenn.edu)

and in animal explants, we also show that Fgf8a requires active canonical Wnt signaling to mediate its activity. Moreover, Fgf8a is a potent inducer of Wnt8 and is required for Wnt8 expression in the paraxial mesoderm. These results indicate that Fgf8a induces NC indirectly through Wnt8 activation, which suggests that these factors function in the same pathway to specify the NC.

## MATERIALS AND METHODS

### *Xenopus* embryo injections, morpholinos and explants culture

Embryos were staged according to Nieuwkoop and Faber (Nieuwkoop and Faber, 1967). *Wnt8* (25 pg) (Wolda et al., 1993), *Fgf8a* (5 pg) (Christen and Slack, 1997), and *XFD* (2 ng) (Amaya et al., 1991) mRNA was synthesized in vitro using the Message Machine Kit (Ambion). *Wnt8* (W8MO; AAAGTGGTGTTCATGATGAAGG; 25–50 ng) (Park and Saint-Jeannet, 2008),  $\beta$ -catenin ( $\beta$ CatMO; 25–50 ng) (Heasman et al., 2000) and *Fgf8a* (F8MO; 50 ng) (Fletcher et al., 2006) morpholino antisense oligonucleotides were purchased from Gene-Tools LLC (Philomath, OR). In whole embryo experiments, synthetic mRNAs and antisense oligonucleotides were injected unilaterally into two-cell-stage embryos. For *Wnt8* and  $\beta$ -catenin, plasmid DNA was injected to avoid axis duplication (100 pg and 200 pg, respectively). Injected embryos were cultured in 0.1 $\times$  normal amphibian medium (NAM). For animal explant experiments, both blastomeres at the two-cell stage were injected in the animal pole region, with *Wnt8* or *Fgf8a* mRNA either alone or in combination with Chordin DNA (10 pg) (Sasai et al., 1994); explants were then dissected at the late blastula stage and immediately cultured in vitro for several hours (5 or 10 hours) in 0.5 $\times$ NAM. In some experiments, 40  $\mu$ M of U0126 (Calbiochem) was added to the culture medium to block the MAPK pathway (Kuroda et al., 2005). Animal explants were subsequently analyzed by real-time RT-PCR for the expression of various marker genes (Hong and Saint-Jeannet, 2007).

### Lineage tracing and in situ hybridization

In all experiments, embryos were co-injected with  $\beta$ -gal mRNA to identify the manipulated side. Embryos at the appropriate stage were fixed in MEMFA and successively processed for Red-Gal staining (Research Organics) and in situ hybridization. Antisense DIG-labeled probes (Genius Kit, Roche) were synthesized using template cDNA encoding *Sox8* (O'Donnell et al., 2006), *Snail2* (Mayor et al., 1995), *Sox2* (Mizuseki et al., 1998), *Pax3* (Bang et al., 1997), *Ap2* (Luo et al., 2003), *Wnt8* (Smith and Harland, 1991), *Fgf8* (Christen and Slack, 1997), *Xbra* (Smith et al., 1991) and *Sox10* (Aoki et al., 2003). Whole-mount in situ hybridization was performed as previously described (Harland, 1991). For in situ hybridization on sections, embryos at stage 12 and 12.5 were fixed in MEMFA for 1 hour and embedded in Paraplast<sup>+</sup>, and 12  $\mu$ m serial sections were hybridized with *Sox8*, *Fgf8* or *Wnt8* probes according to the procedure described by Henry et al. (Henry et al., 1996). Sections were briefly counterstained with Eosin.

### TUNEL staining

TUNEL staining was carried as described (Hensley and Gautier, 1998). Morpholino-injected embryos fixed in MEMFA were rehydrated in PBT and washed in TdT buffer (Roche) for 30 minutes. End labeling was carried out overnight at room temperature in TdT buffer containing 0.5  $\mu$ M DIG-dUTP and 150 U/ml TdT. Embryos were then washed for 2 hours at 65°C in PBS/1 mM EDTA. DIG was detected by anti-DIG Fab fragments conjugated to alkaline phosphatase (Roche; 1:2000) and the chromogenic reaction was performed using NBT/BCIP (Roche).

### Real-time RT-PCR

For each sample, total RNA was extracted from 10 animal explants by using an RNeasy micro RNA isolation kit (Qiagen) according to the manufacturer's instructions. During the extraction procedure the samples were treated with DNase I, to eliminate possible contamination by genomic DNA. The amount of RNA was quantified by measuring the optical density using a spectrophotometer (Beckman). Real-time RT-PCR was performed as previously described, using specific primer sets (Hong and Saint-Jeannet, 2007). In each case, EF1 $\alpha$  was used as an internal reference (data not shown), and each bar on the histograms has been normalized to the level of

EF1 $\alpha$  expression. The histograms in each figure are presented as mean $\pm$ s.e.m. of three independent experiments. A Student's *t*-test was used to define statistically significant values in each group.

## RESULTS

### Fgf8a and Wnt8 are both required for NC induction

Fgf and Wnt signaling have been both implicated in NC induction in *Xenopus*. To better understand their relative contribution to this inductive process, we compared the activity of Fgf8a and Wnt8, two ligands expressed in the paraxial mesoderm around the time of NC induction (Christen and Slack, 1997; Monsoro-Burq et al., 2003; Smith and Harland, 1991; Bang et al., 1999). Morpholino-mediated knockdown of Fgf8a or Wnt8 resulted in a similar loss of NC progenitors at the neurula stage, as determined by the expression of four NC-specific genes: *Pax3*, *Snail2*, *Sox8* and *Sox10* (Fig. 1A). Often this loss of the NC tissue was associated with an expansion of the neural plate (*Sox2*) on the injected side (Fig. 1A). In these embryos lacking Fgf8a or Wnt8 function, mesoderm appeared to form normally, as determined by the expression at the gastrula stage of the general mesoderm marker *Xbra* (Fig. 1B). In both knockdowns, the loss of early NC progenitors resulted into a severe reduction of migrating NC cells in the branchial arches at the tailbud stage (Fig. 1C), due to increased cell death (Fig. 1D). These results suggest that Fgf8a and Wnt8 are both required for NC formation.

We also compared the ability of Wnt8 and Fgf8a to induce NC markers in blastula-stage animal pole explants neuralized by Bmp attenuation (Chordin injection). The neuralization of these explants was assessed by the expression of the pan-neural gene *Sox2*. In this assay, Fgf8a had the ability to enhance the neuralization mediated by Chordin (Fig. 1E), as had been previously reported (Lamb and Harland, 1995). We observed that Fgf8a and Wnt8 were very similar in their ability to activate NC markers (*Pax3*, *Snail2* and *Sox8*) in these explants (Fig. 1E). Importantly, the induction of these NC-specific genes occurred independently of mesoderm formation. Marker genes for skeletal muscle (*m-Actin*) and notochord (*Col2a1*) were not significantly increased in these explants, suggesting that Wnt8 and Fgf8a directly convert these cells from a neural (*Sox2*) to an NC (*Pax3*, *Snail2* and *Sox8*) fate. Taken together, these results indicate that, individually, Fgf8a and Wnt8 are both necessary to generate NC progenitors in *Xenopus*. However, it is unclear whether this dual requirement reflects the fact that these two signaling molecules operate in the same or in parallel pathways (Fig. 1F).

### NC induction by Fgf8a requires active canonical Wnt signaling

To determine whether Fgf8a and Wnt8 are functioning independently, we first compared the ability of Fgf8a and Wnt8 to restore NC progenitors in Wnt8- or Fgf8a-depleted embryos, respectively. Although injection of *Fgf8a* mRNA expands *Snail2* and *Sox8* expression domains (Fig. 2A), as previously reported (Monsoro-Burq et al., 2003; Hong and Saint-Jeannet, 2007), Fgf8a expression was unable to restore the expression of these NC markers in embryos injected with Wnt8 or  $\beta$ -catenin morpholino (Fig. 2A). Conversely, injection of *Wnt8* or  $\beta$ -catenin plasmid DNA was very efficient at restoring NC progenitors in Fgf8a-depleted embryos (Fig. 2B). These results indicate that NC induction by Fgf8a requires active Wnt signaling in the embryo, whereas Wnt8 NC-inducing activity can occur independently of Fgf8a function.

We also evaluated the relationship between Fgf8a and Wnt8 in animal explants. We found that the NC-inducing activity of Wnt8 and Fgf8a in neuralized explants was dramatically inhibited by co-

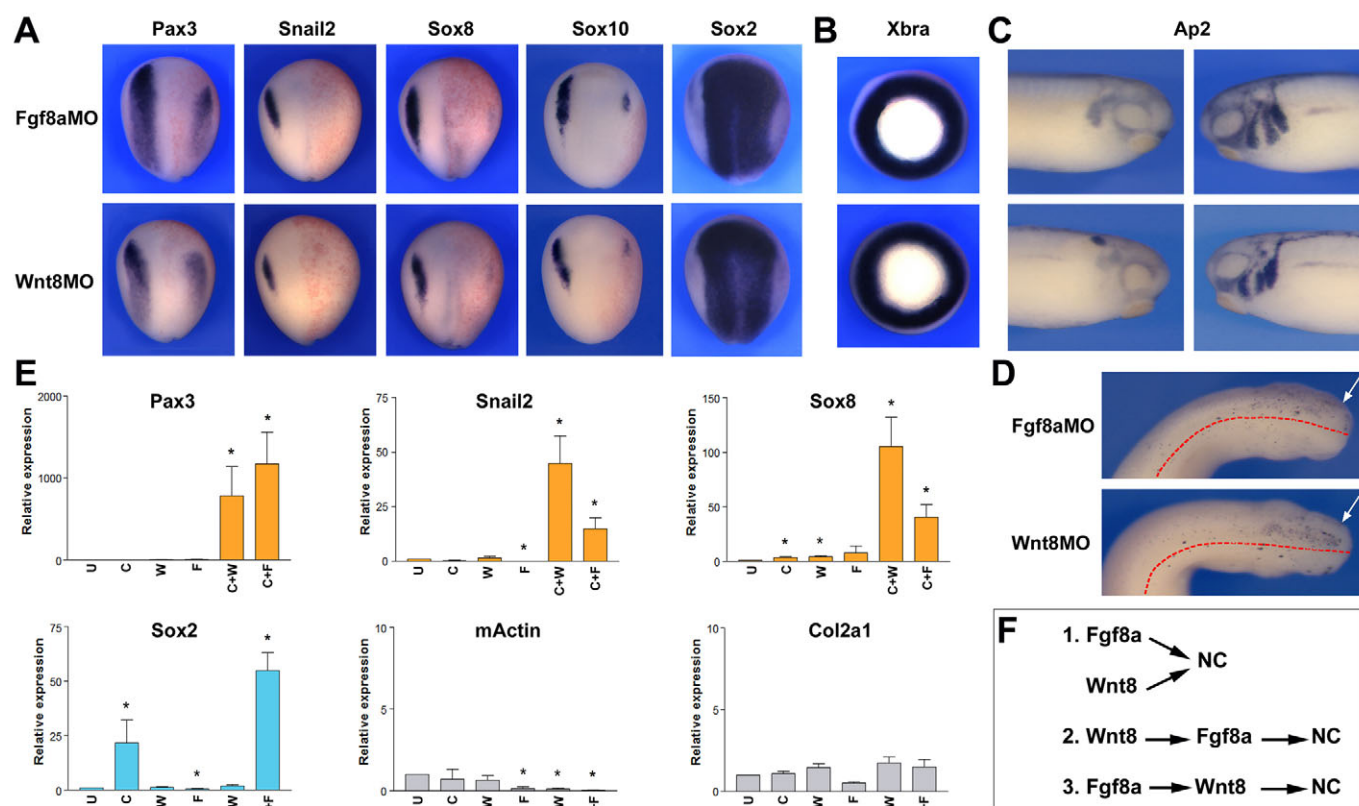

**Fig. 1. Wnt8 and Fgf8a are necessary for NC formation.** (A) Embryos injected with Fgf8a (Fgf8aMO; 50 ng) or Wnt8 (Wnt8MO; 40 ng) morpholino antisense oligonucleotides exhibit a strong reduction of *Pax3*, *Snail2*, *Sox8* and *Sox10* expression at the neurula stage, while the expression domain of the pan-neural marker *Sox2* is expanded. Embryos are viewed from the dorsal side anterior to the top. Injected side is on the right. (B) At the gastrula stage, Fgf8aMO- and Wnt8MO-injected embryos show normal expression of the mesoderm marker *Xbra*. Embryos are viewed from the vegetal pole. (C) At the tailbud stage the migration pattern of cranial NC cells is severely perturbed in both Fgf8aMO- and Wnt8MO-injected embryos, as revealed by expression of the cranial NC marker *Ap2*. Lateral views, dorsal to top. Left panels, anterior to the right (injected side); right panels, anterior to the left (control side). (D) TUNEL staining shows a similar increase in apoptotic cells in the cranial region of Fgf8aMO- and Wnt8MO-injected embryos at the tailbud stage (arrows). Embryos are viewed from the dorsal side, anterior to the right. The dotted lines indicate the position of the midline. (E) In animal explants, Wnt8 (W, 25 pg) or Fgf8a (C, 5 pg) share the same ability to induce NC markers (*Pax3*, *Snail2* and *Sox8*) when co-expressed with the Bmp antagonist Chordin (C, 10 pg; C+W and C+F, respectively). In these explants the induction of NC fate occurs in the absence of mesoderm formation (*mActin* and *Col2a1*). Fgf8a also synergizes with Chordin to induce neural tissue (*Sox2*). Values ( $n=3$ ) are presented as mean $\pm$ s.e.m.; \* $P<0.05$ , versus uninjected animal explant (U). (F) The dual requirement of Fgf8a and Wnt8 suggests that these factors are acting either in parallel (1), or in the same pathway, one upstream of the other (2,3), to generate the NC.

injection of a Wnt8 or a  $\beta$ -catenin morpholino, as visualized by real-time RT-PCR (Fig. 3A). The loss of *Snail2* expression in these explants co-injected with Wnt8 morpholino was also evaluated by whole-mount in situ hybridization (Fig. 3B). Manipulating Wnt signaling in Fgf8a-injected explants did not significantly change the levels of expression of the neural plate marker *Sox2* (Fig. 3A). Whereas in Wnt8-injected explants, the inhibition of Wnt signaling restored *Sox2* expression to levels similar to those observed in neuralized explants (Chordin injected; not shown). These results support the view that Fgf8a requires a functional canonical Wnt pathway to mediate its NC-inducing activity, suggesting that Fgf8a may act upstream of Wnt8 during NC induction.

### Developmental expression of Fgf8 and Wnt8

Although Wnt8 and Fgf8a are good candidate NC inducers, a detailed analysis of their expression pattern as it relates to NC induction has not been reported. At the mid-gastrula stage (stage 11.5), *Fgf8* and *Wnt8* are expressed around the blastopore in a complementary pattern in the dorsolateral and ventrolateral

mesoderm, respectively (Fig. 4A). Their expression overlaps in the lateral region of the mesoderm (Fig. 4A). At stage 12, while *Fgf8* remains confined to the posterior mesoderm, the *Wnt8* expression domain extends anteriorly as the mesoderm involutes (Fig. 4A,B). It is around stage 12 that early NC markers, such as *Sox8* (O'Donnell et al., 2006), are first activated in the prospective NC tissue (Fig. 4B).

Adjacent transverse sections of stage 12 and stage 12.5 embryos were hybridized with *Sox8* or *Wnt8* probes to further evaluate their spatial relationship (Fig. 4C). At stage 12, *Wnt8* is detected in the mesoderm immediately contiguous to the NC-forming region where the first *Sox8*-positive cells are detected (Fig. 4C). At stage 12.5, *Sox8* is greatly increased in the ectoderm adjacent to *Wnt8* expression in the mesoderm. At this stage, Wnt8 is no longer confined to the mesoderm and is also detected in the ectoderm layer, as previously reported (Bang et al., 1999). The hybridization of adjacent serial sections with *Sox8*, *Wnt8* and *Fgf8* probes confirms that *Fgf8* is never co-expressed with *Wnt8* in the mesoderm underlying the NC-forming region (Fig. 4D). *Fgf8* expression is



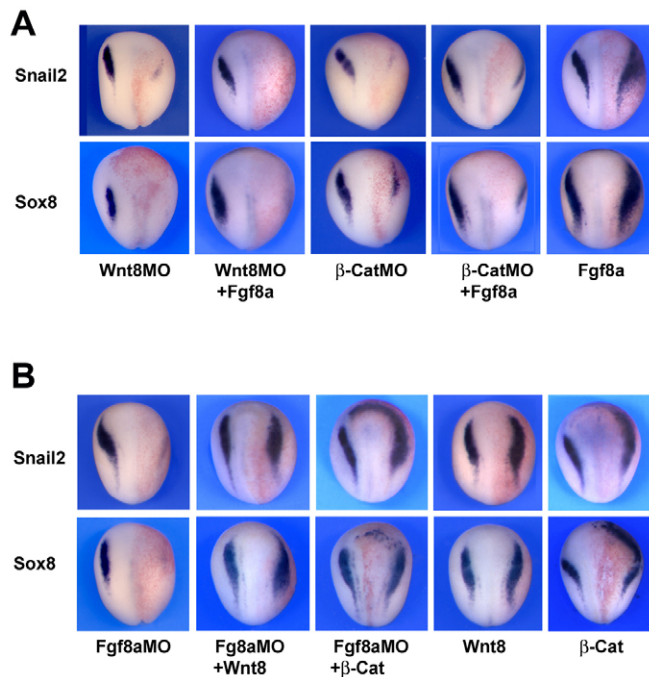

**Fig. 2.** *Fgf8a* and *Wnt8* differ in their ability to restore NC progenitors in *Wnt8*- and *Fgf8a*-deficient embryos. (A) *Fgf8a* mRNA injection fails to rescue *Snail2* and *Sox8* expression at the neural plate border of embryos injected with *Wnt8*MO (25 ng) or  $\beta$ -*Cat*MO (25 ng). A single injection of *Fgf8a* mRNA (2.5 pg) expands *Snail2* and *Sox8* expression domains. (B) Conversely, *Wnt8* (100 pg) or  $\beta$ -*catenin* (200 pg) plasmid DNA injection restores *Snail2* and *Sox8* expression in embryos injected with *Fgf8a*MO (50 ng). Injection of *Wnt8* or  $\beta$ -*catenin* in sibling embryos expanded *Snail2* and *Sox8* expression domains. In all panels, embryos are viewed from the dorsal side with anterior to the top. The injected side is to the right.

restricted to the posterior mesoderm at this stage (Fig. 4E). With the understanding that we are looking at the mRNA expression of two secreted factors, and in the absence of appropriate antibodies to further evaluate the localization of the corresponding proteins, these data suggest that compared with *Fgf8a* the spatiotemporal expression of *Wnt8* is more consistent with a role in NC induction.

### ***Fgf8a* is a potent inducer of *Wnt8* and is required for *Wnt8* expression in the paraxial mesoderm**

Our results so far indicate that *Fgf8a* requires an intact canonical Wnt pathway to activate NC-specific genes in whole embryos and in animal explants, suggesting that *Fgf8a* may act upstream of *Wnt8* during NC induction. Moreover, the expression pattern of these two factors is consistent with this view. These observations directly imply that *Fgf8a* must have the ability to activate *Wnt8* expression. We tested this possibility in the context of animal explants, and found that expression of *Fgf8a* alone or in combination with Chordin was a very potent inducer of *Wnt8* (Fig. 5A), whereas *Wnt8* expression had virtually no effect on *Fgf8* expression levels, supporting the idea of a unidirectional relationship between these two ligands. Furthermore, we showed that the induction of *Wnt8* by *Fgf8a* in neuralized explants was mediated through the MAPK pathway, as *Wnt8* expression is severely reduced in the presence of the MAPK inhibitor U0126 (see Fig. S1A in the supplementary material).

In the whole embryo, targeted injection of an *Fgf8a* morpholino or expression of a dominant-negative Fgf receptor (XFD) (Amaya et al., 1991) resulted in a reduction of *Wnt8* expression in the paraxial mesoderm of late-gastrula-stage embryos (76%,  $n=73$ ; and 91%,  $n=40$ ; respectively; Fig. 5B). Conversely, overexpression of *Fgf8a* dramatically expanded the *Wnt8* expression domain in most injected embryos (98%;  $n=83$ ) (Fig. 5B). These results indicate that *Fgf8a* is required for *Wnt8* expression in the paraxial mesoderm, which is consistent with the proposal that *Fgf8a* functions upstream of *Wnt8* during NC induction.

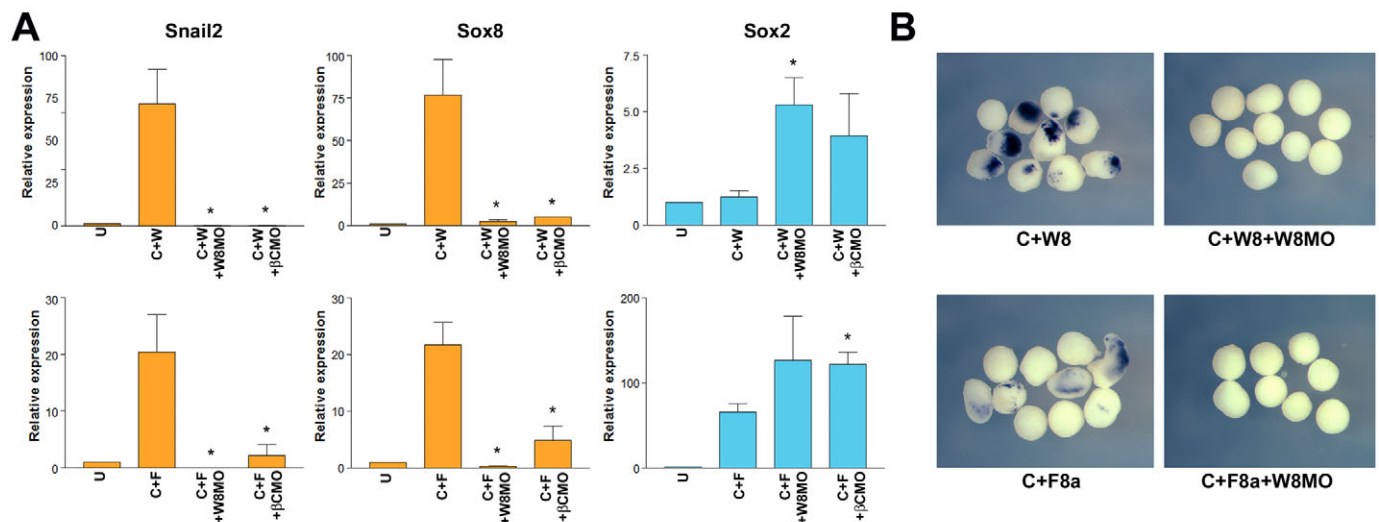

**Fig. 3.** NC induction by *Fgf8a* requires active canonical Wnt signaling in animal explants. (A) In animal explants the induction of NC markers (*Snail2* and *Sox8*) by the co-expression of Chordin (10 pg) and *Wnt8* (25 pg; C+W), or Chordin (10 pg) and *Fgf8a* (5 pg; C+F), is dramatically reduced in the context of embryos injected with *Wnt8*MO (W8MO, 50 ng) or  $\beta$ -*Cat*MO ( $\beta$ CMO, 50 ng). Interference with the Wnt signaling pathway did not affect (C+F) or restore (C+W) the neuralization of these explants (*Sox2*). Values ( $n=3$ ) are presented as mean  $\pm$  s.e.m.; \* $P<0.05$ , versus C+W (upper graphs) or C+F (lower graphs) samples. U, uninjected animal explant. (B) The expression of *Snail2* detected by whole-mount in situ hybridization in Chordin and *Wnt8* (C+W8), or Chordin and *Fgf8a* (C+F8a), treated animal explants is abolished by the co-injection of *Wnt8*MO (W8MO; 50 ng).

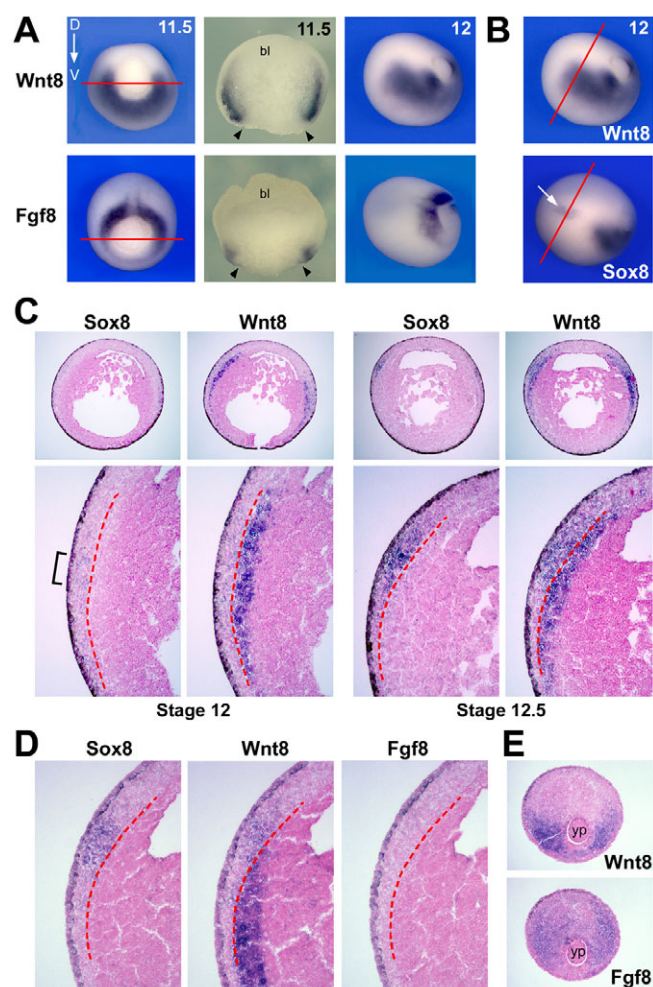

**Fig. 4. Developmental expression of Wnt8 and Fgf8.**

(A) Comparison of *Wnt8* and *Fgf8* expression at the gastrula stage. At the mid-gastrula stage (11.5), *Wnt8* and *Fgf8* have a complementary expression pattern in the ventrolateral and dorsolateral mesoderm, respectively. The embryos are oriented dorsal (D) to the top. Hemisections (red lines in the left panels) of these embryos along the animal-vegetal axis reveal that both genes are co-expressed in the lateral mesoderm. The arrowheads indicate the position of the lateral lip of the blastopore (bl, blastocoel). At stage 12, the *Wnt8* expression domain expands anteriorly into the involuting mesoderm, the future paraxial mesoderm, while *Fgf8* remains confined to the posterior mesoderm. (B) Comparative expression of *Wnt8* and *Sox8* at stage 12. *Sox8* expression in the ectoderm (arrow) is adjacent to *Wnt8* expression in the mesoderm. The red lines indicate the level of the serial sections shown in C,D. (C) Expression of *Sox8* and *Wnt8* on adjacent sections of a stage 12 embryo highlights the mesoderm expression of *Wnt8* underlying the first *Sox8*-positive cells in the NC-forming region (bracket). At stage 12.5, *Sox8* expression is stronger in the NC domain, and *Wnt8* becomes more broadly expressed in both the ectoderm and the mesoderm layers. The red dotted lines in the lower panels demarcate the separation between the ectoderm and the mesoderm layers. Lower panels are higher magnifications of the upper panels. (D) Comparative expression of *Sox8*, *Wnt8* and *Fgf8* on adjacent sections of a stage 12/12.5 embryo confirms that *Fgf8* is not co-expressed with *Wnt8* in the mesoderm underlying the NC-forming region. The red dotted lines indicate the separation between the ectoderm and the mesoderm layers. (E) In the posterior region of the same embryo, *Fgf8* is detected in the dorsolateral mesoderm, around the yolk plug (yp), while *Wnt8* is confined to the ventrolateral region. Dorsal to the top.

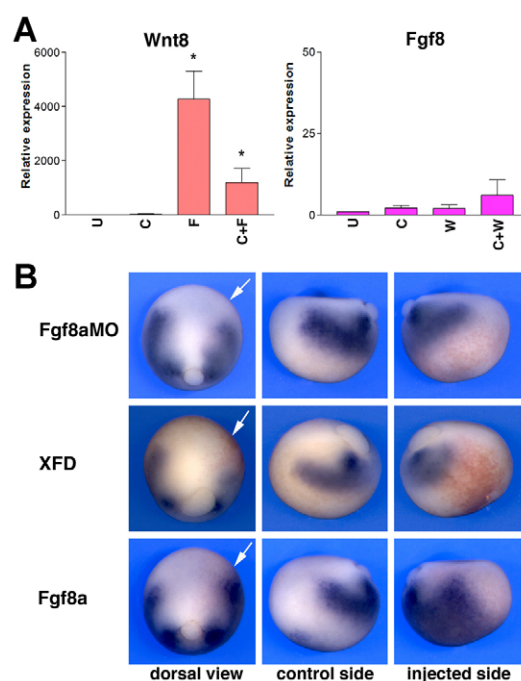

**Fig. 5. Fgf8a is a strong inducer of Wnt8 in animal explants and in whole embryos.** (A) Animal explants derived from embryos injected with *Fgf8a* (F) or with a combination of *Fgf8a* and *Chordin* (C+F) show a strong upregulation of *Wnt8* after 4 hours in culture. For comparison, *Wnt8* (W) or *Wnt8* and *Chordin* (C+W) co-injection had little effect on the expression levels of *Fgf8*. U, uninjected animal explant. Values ( $n=3$ ) are presented as mean $\pm$ s.e.m.; \* $P<0.05$ , versus uninjected animal explant (U). (B) In whole embryos, loss of Fgf function by injection (arrow) of *Fgf8a*MO (50 ng) or a dominant-negative Fgf receptor (*XFD*; 2 ng) results in a reduction of *Wnt8* expression in the involuting mesoderm at stage 12. Conversely, *Fgf8a* (5 pg) mis-expression strongly upregulates *Wnt8*. For all injections, dorsal and lateral views (control and injected sides) of the same embryo are shown. Dorsal views, anterior to the top, injected side to the right (arrows). Lateral views, dorsal to the top; for the control side anterior is to the left, for the injected side anterior is to the right.

### Fgf8a promotes NC fate at the anterior neural fold by up-regulating Wnt8

The absence of NC tissue at the anterior edge of the neural plate (Fig. 6A) is believed to depend on the activity of an endogenous Wnt inhibitor, *Dkk1*, whose function is to prevent Wnt-mediated expansion of the NC tissue in this region of the ectoderm (Carmona-Fontaine et al., 2007). Consistent with this view, inhibition of *Dkk1* function expands the NC domain anteriorly (Carmona-Fontaine et al., 2007), and excess Wnt signaling in this region of the embryo results in ectopic NC formation at the anterior neural fold (Wu et al., 2004; Voigt and Papalopulu, 2006; Carmona-Fontaine et al., 2007) (Fig. 6B). Surprisingly, several laboratories have also reported that Fgf misexpression can also induce the expression of NC markers in this NC-free domain (Villanueva et al., 2002; Monsoro-Burq et al., 2003; Monsoro-Burq et al., 2005) (Fig. 6C), suggesting that a mechanism independent of *Dkk1* may preclude NC formation in this region. Our findings placing *Fgf8a* upstream of *Wnt8* may help to resolve this apparent discrepancy. We observed that *Fgf8a*-mediated induction of *Snail2* and *Sox8* at the anterior neural fold was associated with a dramatic upregulation of *Wnt8* anteriorly (Fig. 6C),



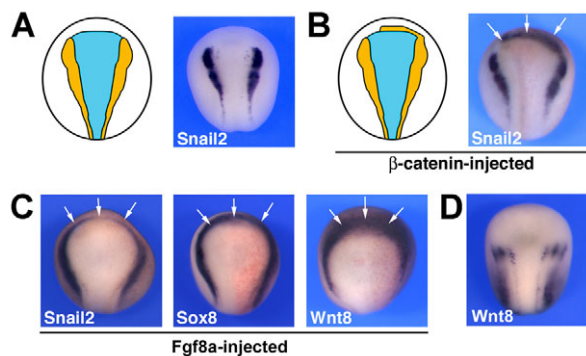

**Fig. 6. Fgf8a induces NC at the anterior neural fold indirectly.**

(A) The anterior neural plate (blue) is devoid of NC tissue (orange) as a result of the activity of a Wnt inhibitor, Dkk1 (Carmona-Fontaine et al., 2007). *Snail2* expression is shown in a control embryo at stage 15. (B)  $\beta$ -catenin misexpression (200 pg) can overcome this inhibition to induce NC markers (*Snail2*) at the anterior neural fold (arrows). (C) Fgf8a (5 pg) misexpression can also induce NC markers (*Snail2* and *Sox8*) at the anterior neural fold (arrows), an activity that is mediated by upregulation of *Wnt8* in this region of the embryo (arrows). (D) Normal pattern of expression of *Wnt8* in a control embryo at the same stage. In all panels the embryos are viewed from the dorsal side, anterior to the top.

when compared with control embryos (Fig. 6D), suggesting that the activity of the Wnt inhibitor Dkk1 can fully account for the exclusion of the NC from the anterior neural fold.

## DISCUSSION

In this study we have addressed the outstanding question of the relative contribution of Fgf and Wnt signaling pathways to the induction of the NC in *Xenopus* by comparing the activity of Wnt8 and Fgf8a, two putative NC inducers expressed in the paraxial mesoderm. By using a number of assays in the whole embryo and animal explants, we demonstrate that Fgf8a induces the NC indirectly through the activation of Wnt8 in the paraxial mesoderm, suggesting that signaling through Wnt8 can fully account for the NC-inducing activity of the paraxial mesoderm in *Xenopus*. How can these observations be reconciled with other studies that have implicated an Fgf, rather than a Wnt signal, as the paraxial mesoderm-derived signal required for NC induction (Mayor et al., 1997; Monsoro-Burq et al., 2003)?

The existence of a paraxial mesoderm-derived Wnt signal in NC induction, which was first proposed almost 10 years ago (Bang et al., 1999), has been recently challenged (Monsoro-Burq et al., 2003). In this study, the authors proposed that by interfering with Wnt signaling extracellularly, by using Wnt antagonists, such as dominant-negative Wnt8 (LaBonne and Bronner-Fraser, 1998; Bang et al., 1999) or Nfz8, a truncated and diffusible form of the Wnt receptor Frizzled 8 (Monsoro-Burq et al., 2003), NC formation was impaired not by blocking the activity of a Wnt signal derived from the paraxial mesoderm but rather, indirectly, by altering the character of the mesoderm and therefore changing its signaling properties. In support of this view, these authors reported that interfering with the response of the ectoderm to Wnt signaling by means of intracellular Wnt antagonists, such as Gsk3 and dominant-negative Tcf3, did not prevent the induction of NC markers by the paraxial mesoderm (Monsoro-Burq et al., 2003). However, in these studies we cannot exclude the possibility that these intracellular inhibitors were not fully active at blocking Wnt signaling (Huang and Saint-Jeannet,

2004). Moreover, these findings conflict with other studies that have clearly demonstrated that interfering with the reception of Wnt signaling in the ectoderm, by using dominant-negative forms of Frizzled 3 (Fz3), Frizzled 7 (Fz7) and their co-receptor Lrp6, or by morpholino-mediated knockdown of Fz3, Fz7, Lrp6, Kremen and  $\beta$ -catenin, was sufficient to block NC formation in the whole embryo (Tamai et al., 2000; Deardorff et al., 2001; Wu et al., 2004; Abu-Elmagd et al., 2006; Hassler et al., 2007).

The same study proposed that an Fgf rather than a Wnt signal was in fact responsible for the NC-inducing activity of the paraxial mesoderm (Monsoro-Burq et al., 2003). This finding was based on the observation that a piece of dorsolateral marginal zone (DLMZ), which normally induces NC markers in the ectoderm (Bonstein et al., 1998), was unable to induce NC when recombined with animal explants made refractory to Fgf signaling by expression with a dominant-negative Fgf receptor (XFD). However, these experiments do not take into account the fact that intact Fgf signaling is required for neuralization of the ectoderm by Bmp antagonists (Launay et al., 1996; Delaune et al., 2004; Kuroda et al., 2005). Therefore, and because neural and NC induction are tightly linked, an alternative interpretation would be that NC induction was blocked not as a result of the inability of a DLMZ-derived Fgf ligand to signal in the ectoderm, but rather, indirectly, because the neuralization of these explants was impaired by the expression of XFD (Launay et al., 1996). Consistent with this possibility, and as previously described (Kuroda et al., 2005), we observed that the MAPK inhibitor U0126 blocks neuralization by Chordin (see Fig. S1B,C in the supplementary material). Moreover, animal explants co-injected with Chordin and Fgf8a, or Chordin and Wnt8, and cultured in the presence of U0126, show reduced expression of the NC marker *Snail2* (see Fig. S1B,C in the supplementary material). These results confirm previous observations on the active role played by Fgf/MAPK signaling in neuralization of the ectoderm by Bmp antagonists (Launay et al., 1996; Delaune et al., 2004; Kuroda et al., 2005). Furthermore, these observations suggest that the loss of NC in Fgf8a- and Wnt8-injected explants treated with the MAPK inhibitor (see Fig. S1B,C in the supplementary material), or in explants injected with XFD and recombined with DLMZ (Monsoro-Burq et al., 2003), is likely to be secondary to the inability of Bmp antagonists to neuralize the ectoderm in the absence of an active MAPK pathway.

Other evidence suggesting that Wnt and Fgf signaling may function independently during NC induction came from the observation that these factors differ in their ability to regulate the expression of two neural plate border-specifier genes, Pax3 and Msx1 (Monsoro-Burq et al., 2005). However, other studies have shown that Pax3 expression at the neural plate border is not only dependent on a Wnt signal (Monsoro-Burq et al., 2005), but is also tightly regulated by Fgf8a signaling (Sato et al., 2005; Hong and Saint-Jeannet, 2007). Similarly, Msx1 expression in the ectoderm is controlled by either Fgf8 (Monsoro-Burq et al., 2005) or Wnt8 signaling (Bang et al., 1999; Tribulo et al., 2003; Hong and Saint-Jeannet, 2007). The differences in the activity of Wnt8 and Fgf8a reported by different laboratories could be explained by subtle differences in the types of reagent or assay used to evaluate the expression of these genes.

It has been previously shown that the co-expression of Chordin and eFgf induces *Snail2* in animal explants, and that this activity is inhibited by the expression of a dominant-negative Wnt8, raising the possibility that the induction of *Snail2* by Fgf signaling might be indirect (LaBonne and Bronner-Fraser, 1998). However, because eFgf is also a potent mesoderm inducer (Isaacs et al., 1992), in these

experiments we cannot exclude the possibility that the *Snail2* activation is secondary to the production of a mesoderm-derived Wnt signal (LaBonne and Bronner-Fraser, 1998). By contrast, Fgf8a does not induce mesoderm in animal explants (Fig. 1E) (Fletcher et al., 2006), suggesting that Fgf8a NC-inducing activity is directly linked to its ability to regulate Wnt8 expression.

Spatially, *Wnt8* is contiguous to the *Sox8* expression domain around the time of NC induction, these factors being confined to the paraxial mesoderm and the ectoderm, respectively. Conversely, Fgf8 remains restricted to the posterior mesoderm and never comes into close proximity with the NC-forming region (Fig. 4). Although we cannot exclude the possibility that Fgf8a protein diffuses to induce NC, at the mRNA level the expression pattern of these molecules is more consistent with a role of Wnt8 in NC induction. Specific antibodies will be needed to further document the expression of Wnt8 and Fgf8a, and the extent to which these molecules diffuse within and across germ layers.

In *Xenopus*, Fz3 and Fz7 are expressed in the ectoderm, including the NC-forming region, and are therefore excellent candidates to mediate Wnt8 activity. Fz3- and Fz7-depleted embryos completely lack NC progenitors (Deardorff et al., 2001; Abu-Elmagd et al., 2006), and *Snail2* induction by Wnt8 in neuralized animal explants is blocked in the absence of Fz7 function (Abu-Elmagd et al., 2006). Nuclear accumulation of  $\beta$ -catenin has been reported in the region of the ectoderm fated to form the NC (Schohl and Fagotto, 2002), consistent with a direct role of Wnt signaling in NC induction. Additionally,  $\beta$ -catenin has been shown to induce NC markers in animal explants in a cell-autonomous manner (LaBonne and Bronner-Fraser, 1998), and the *Snail2* promoter in both *X. laevis* and *X. tropicalis* has functional Tcf/Lef-binding sites (Vallin et al., 2001), providing further evidence that canonical Wnt signaling induces the NC directly.

In summary, this study addresses the outstanding question of the relative contribution of Fgf and Wnt signaling to NC induction in *Xenopus*. Our results provide evidence that, although Fgf8a and Wnt8 are both required to induce the NC, the NC-inducing activity of Fgf8a is indirect through the activation of Wnt8 expression in the paraxial mesoderm. We therefore propose that Fgf8a and Wnt8 are part of the same signaling cascade that specifies the NC in *Xenopus*.

We are grateful to Dr Peter Klein for comments on the manuscript and to Beth Aksim for technical assistance. C.-S.H. was supported by a research grant (2007) from Daegu University. This work was supported by a grant from the National Institutes of Health to J.-P.S.-J. (RO1-DE014212).

## Supplementary material

Supplementary material for this article is available at <http://dev.biologists.org/cgi/content/full/135/23/3903/DC1>

## References

- Abu-Elmagd, M., Garcia-Morales, C. and Wheeler, G. (2006). Frizzled 7 mediates canonical Wnt in neural crest induction. *Dev. Biol.* **298**, 285-298.
- Amaya, E., Musci, T. J. and Kirschner, M. W. (1991). Expression of a dominant negative mutant of the FGF receptor disrupts mesoderm formation in *Xenopus* embryos. *Cell* **66**, 257-270.
- Aoki, Y., Saint-Germain, N., Gyda, M., Magner-Fink, E., Lee, Y.-H., Credidio, C. and Saint-Jeannet, J.-P. (2003). *Sox10* regulates the development of neural crest-derived melanocytes in *Xenopus*. *Dev. Biol.* **259**, 19-33.
- Bang, A. G., Papalopulu, N., Kintner, C. and Goulding, M. D. (1997). Expression of Pax3 is initiated in the early neural plate by posteriorizing signals produced by the organizer and by posterior non-axial mesoderm. *Development* **124**, 2075-2085.
- Bang, A. G., Papalopulu, N., Goulding, M. D. and Kintner, C. (1999). Expression of Pax-3 in the lateral neural plate is dependent on a Wnt-mediated signal from the posterior non-axial mesoderm. *Dev. Biol.* **212**, 366-380.
- Bonstein, L., Elias, S. and Frank, D. (1998). Paraxial-fated mesoderm is required for neural crest induction in *Xenopus* embryos. *Dev. Biol.* **193**, 156-168.
- Carmona-Fontaine, C., Acuna, G., Ellwanger, K. C. and Mayor, R. (2007). Neural crests are actively precluded from the anterior neural fold by a novel inhibitory mechanism dependent on Dickkopf1 secreted by the prechordal mesoderm. *Dev. Biol.* **309**, 208-221.
- Chang, C. and Hemmati-Brivanlou, A. (1998). Neural crest induction by Xwnt7B in *Xenopus*. *Dev. Biol.* **194**, 129-134.
- Christen, B. and Slack, J. M. W. (1997). FGF-8 is associated with anteroposterior patterning and limb regeneration in *Xenopus*. *Dev. Biol.* **192**, 455-466.
- Deardorff, M. A., Tan, C., Saint-Jeannet, J.-P. and Klein, P. S. (2001). A role for frizzled-3 in neural crest development. *Development* **128**, 3655-3663.
- Delaune, E., Lemaire, P. and Kodjabachian, L. (2004). Neural induction in *Xenopus* requires early FGF signaling in addition to BMP inhibition. *Development* **132**, 299-310.
- Fletcher, R. B., Baker, J. C. and Harland, R. M. (2006). FGF8 spliceforms mediate early mesoderm and posterior neural tissue formation in *Xenopus*. *Development* **133**, 1703-1714.
- Garcia-Castro, M. I., Marcelle, C. and Bronner-Fraser, M. (2002). Ectodermal Wnt function as a neural crest inducer. *Science* **297**, 848-851.
- Hari, L., Brault, V., Kleber, M., Lee, H. Y., Ille, F., Leimerroth, R., Paratore, C., Suter, U., Kemler, R. and Sommer, L. (2002). Lineage-specific requirement of  $\beta$ -catenin in neural crest development. *J. Cell Biol.* **159**, 867-880.
- Harland, R. M. (1991). In situ hybridization: an improved whole-mount method for *Xenopus* embryos. *Methods Cell Biol.* **36**, 685-695.
- Hassler, C., Cruciat, C. M., Huang, Y. L., Kuriyama, S., Mayor, R. and Niehrs, C. (2007). Kremen is required for neural crest induction in *Xenopus* and promotes LRP6-mediated Wnt signaling. *Development* **134**, 4255-4263.
- Heasman, J., Kofron, M. and Wylie, C. (2000).  $\beta$ -catenin signaling activity dissected in the early *Xenopus* embryo: a novel antisense approach. *Dev. Biol.* **222**, 124-134.
- Heeg-Truesdell, E. and LaBonne, C. (2007). Multiple roles for Wnt signaling in the development of the vertebrate neural crest. *Adv. Dev. Biol.* **17**, 204-221.
- Henry, G. L., Brivanlou, I. H., Kessler, D. S., Hemmati-Brivanlou, A. and Melton, D. A. (1996). TGF-beta signals and a pattern in *Xenopus laevis* endodermal development. *Development* **122**, 1007-1015.
- Hensey, C. and Gautier, J. (1998). Programmed cell death during *Xenopus* development: a spatio-temporal analysis. *Dev. Biol.* **203**, 36-48.
- Hong, C.-S. and Saint-Jeannet, J.-P. (2007). The activity of Pax3 and Zic1 regulates three distinct cell fates at the neural plate border. *Mol. Biol. Cell* **18**, 2192-2202.
- Huang, X. and Saint-Jeannet, J.-P. (2004). Induction of the neural crest and the opportunities of life on the edge. *Dev. Biol.* **275**, 1-11.
- Ikeya, M., Lee, S. M. K., Johnson, J. E., McMahon, A. P. and Takada, S. (1997). Wnt signaling is required for expansion of neural crest and CNS progenitors. *Nature* **389**, 966-970.
- Isaacs, H. V., Tannahill, D. and Slack, J. M. W. (1992). Expression of a novel FGF in the *Xenopus* embryos: a new candidate inducing factor for mesoderm and anteroposterior specification. *Development* **114**, 711-720.
- Jones, N. C. and Trainor, P. A. (2005). Role of morphogens in neural crest cell determination. *J. Neurobiol.* **64**, 388-404.
- Kengaku, M. and Okamoto, H. (1993). Basic fibroblast growth factor induces differentiation of neural tube and neural crest lineages of cultured ectoderm cells from *xenopus* gastrula. *Development* **119**, 1067-1078.
- Knecht, A. K. and Bronner-Fraser, M. (2002). Induction of the neural crest: a multigenic process. *Nat. Rev. Genet.* **3**, 453-461.
- Kuroda, H., Fuentealba, L., Ikeda, A., Reversade, B. and Deroberis, E. M. (2005). Default neural induction: neuralization of dissociated *xenopus* cells is mediated by ras/mapk activation. *Genes Dev.* **19**, 1022-1027.
- LaBonne, C. and Bronner-Fraser, M. (1998). Neural crest induction in *Xenopus*: evidence for a two-signal model. *Development* **125**, 2403-2414.
- Lamb, T. M. and Harland, R. M. (1995). Fibroblast growth factor is a direct neural inducer, which combined with noggin generates anterior-posterior neural pattern. *Development* **121**, 3627-3636.
- Launay, C., Fromentaux, V., Shi, D.-L. and Boucaut, J.-C. (1996). A truncated FGF receptor blocks neural induction by endogenous *Xenopus* inducers. *Development* **122**, 869-880.
- Le Douarin, N. M., Creuzet, S., Couly, G. and Dupin, E. (2004). Neural crest cell plasticity and its limits. *Development* **131**, 4637-4650.
- Lewis, J. L., Bonner, J., Modrell, M., Ragland, J. W., Moon, R. T., Dorsky, R. I. and Raible, D. W. (2004). Reiterated Wnt signaling during zebrafish neural crest development. *Development* **131**, 1299-1308.
- Luo, T., Lee, Y.-H., Saint-Jeannet, J.-P. and Sargent, T. D. (2003). Induction of neural crest in *Xenopus* by transcription factor AP2 $\alpha$ . *Proc. Natl. Acad. Sci. USA* **100**, 532-537.
- Marchant, L., Linker, C., Ruiz, P., Guerrero, I. and Mayor, R. (1998). The inductive properties of mesoderm suggest that the neural crest cells are specified by a BMP gradient. *Dev. Biol.* **198**, 319-329.
- Mayor, R., Morgan, R. and Sargent, M. G. (1995). Induction of the prospective neural crest of *Xenopus*. *Development* **121**, 767-777.
- Mayor, R., Guerrero, I. and Martinez, C. (1997). Role of FGF and noggin in neural crest induction. *Dev. Biol.* **189**, 1-12.

- Mizuseki, K., Kishi, M., Matsui, M., Nakanishi, S. and Sasai, Y. (1998). *Xenopus* Zic-related-1 and Sox-2, two factors induced by chordin, have distinct activities in the initiation of neural induction. *Development* **125**, 579-587.
- Monsoro-Burq, A. H., Fletcher, R. B. and Harland, R. M. (2003). Neural crest induction by paraxial mesoderm in *Xenopus* embryos requires FGF signals. *Development* **130**, 3111-3124.
- Monsoro-Burq, A. H., Wang, E. and Harland, R. (2005). Msx1 and Pax3 cooperate to mediate FGF8 and WNT signals during *Xenopus* neural crest induction. *Dev. Cell* **8**, 167-178.
- Nguyen, V. H., Schmid, B., Trout, J., Connors, S. A., Ekker, M. and Mullins, M. C. (1998). Ventral and lateral regions of the zebrafish gastrula, including the neural crest progenitors, are established by a bmp2b/swirl pathway of genes. *Dev. Biol.* **199**, 93-110.
- Nieuwkoop, P. D. and Faber, J. (1967). *Normal table of Xenopus Laevis* (Daudin). Amsterdam: North-Holland Publishing Company.
- O'Donnell, M., Hong, C. S., Huang, X., Delnicki, R. J. and Saint-Jeannet, J. P. (2006). Functional analysis of Sox8 during neural crest development in *Xenopus*. *Development* **133**, 3817-3826.
- Park, B.-Y. and Saint-Jeannet, J.-P. (2008). Hindbrain-derived Wnt and Fgf signals cooperate to specify the otic placode in *Xenopus*. *Dev. Biol.* (in press).
- Saint-Jeannet, J.-P., He, X., Varmus, H. E. and Dawid, I. B. (1997). Regulation of dorsal fate in the neuraxis by Wnt-1 and Wnt-3a. *Proc. Natl. Acad. Sci. USA* **94**, 13713-13718.
- Sasai, Y., Lu, B., Steinbeisser, H., Geissert, D., Gont, L. K. and De Robertis, E. M. (1994). *Xenopus* chordin: a novel dorsalizing factor activated by organizer-specific homeobox genes. *Cell* **79**, 779-790.
- Sato, T., Sasai, N. and Sasai, Y. (2005). Neural crest determination by co-activation of Pax3 and Zic1 genes in *Xenopus* ectoderm. *Development* **132**, 2355-2363.
- Schohl, A. and Fagotto, F. (2002). Beta-catenin, MAPK and Smad signaling during early *Xenopus* development. *Development* **129**, 37-52.
- Smith, W. C. and Harland, R. M. (1991). Injected Xwnt-8 mRNA acts early in *Xenopus* embryos to promote formation of vegetal dorsalizing center. *Cell* **67**, 735-765.
- Smith, J. C., Price, B. M., Green, J. B., Weigel, D., Herrmann, B. G. (1991). Expression of a *Xenopus* homolog of Brachyury (T) is an immediate-early response to mesoderm induction. *Cell* **67**, 79-87.
- Tamai, K., Semenov, M., Kato, Y., Spokony, R. F., Liu, C., Katsuyama, Y., Hess, F., Saint-Jeannet, J.-P. and He, X. (2000). LDL receptor-related proteins in Wnt signal transduction. *Nature* **407**, 530-535.
- Tribulo, C., Ayba, M. J., Nguyen, V. H., Mullins, M. C. and Mayor, R. (2003). Regulation of Msx genes by a Bmp gradient is essential for neural crest specification. *Development* **130**, 6441-6452.
- Vallin, J., Thuret, R., Giacomello, E., Faraldo, M. M., Thiery, J. P. and Broders, F. (2001). Cloning and characterization of three *Xenopus* slug promoters reveal direct regulation by Lef/beta-catenin signaling. *J. Biol. Chem.* **276**, 30350-30358.
- Villanueva, S., Glavic, A., Ruiz, P. and Mayor, R. (2002). Posteriorization by FGF, Wnt, and retinoic acid is required for neural crest induction. *Dev. Biol.* **241**, 289-301.
- Voigt, J. and Papalopulu, N. (2006). A dominant-negative form of the E3 ubiquitinligase Cullin-1 disrupts the correct allocation of cell fate in the neural crest lineage. *Development* **133**, 559-568.
- Wolda, S. L., Moody, C. J. and Moon, R. T. (1993). Overlapping expression of Xwnt-3a and Xwnt-1 in neural tissue of *Xenopus laevis* embryos. *Dev. Biol.* **155**, 46-57.
- Wu, J., Saint-Jeannet, J.-P. and Klein, P. S. (2003). Wnt-frizzled signaling in neural crest formation. *Trends Neurosci.* **26**, 40-45.
- Wu, J., Yang, J. and Klein, P. S. (2004). Neural crest induction by the canonical Wnt pathway can be dissociated from anterior-posterior neural patterning in *Xenopus*. *Dev. Biol.* **279**, 220-232.
